# Deep learning based feature extraction for prediction and interpretation of sharp-wave ripples

Andrea Navas-Olive<sup>1\*</sup>, Rodrigo Amaducci<sup>2\*</sup>, Teresa Jurado-Parras<sup>1</sup>, Enrique R Sebastian<sup>1</sup> and Liset M de la Prida<sup>1</sup>✉

<sup>1</sup>Instituto Cajal. CSIC. Madrid 28002, Spain.

<sup>2</sup> Grupo de Neurocomputación Biológica (GNB). Universidad Autónoma de Madrid. Madrid 28049. Spain

\*These authors contributed similar

✉ Corresponding author: [lmprida@cajal.csic.es](mailto:lmprida@cajal.csic.es)

## Abstract

Local field potential (LFP) deflections and oscillations define hippocampal sharp-wave ripples (SWR), one of the most synchronous events of the brain. SWR reflect firing and synaptic current sequences emerging from cognitively relevant neuronal ensembles. Current spectral methods fail to capture their mechanistic complexity, thus limiting progress. Here, we show how one-dimensional convolutional networks operating over high-density LFP hippocampal recordings allowed for automatic identification of SWR. When applied to ultra-dense hippocampus-wide recordings, we discovered physiologically relevant processes associated to the emergence of SWR, prompting for novel classification criteria. To gain interpretability, we developed a method to interrogate the operation of the artificial network. We found it relied in feature-based specialization, which permit identification of spatially segregated oscillations and deflections, as well as synchronous population firing. Thus, using deep learning based approaches may change the current heuristic for a better mechanistic interpretation of these relevant neurophysiological events.

**Keywords:** ripples; convolutional neural networks; Neuropixels; hippocampus; dorsoventral;

## 29 Introduction

30 Interpreting brain signals is essential to understand cognition and behavior. Biologically  
31 relevant oscillations are considered reliable markers of brain operation (Buzsáki et al.,  
32 2012; Friston et al., 2015). Thus, analysis of either surface electroencephalography  
33 (EEG) or intracranial LFP is typically based on spectral methods relying on gold-  
34 standard definitions (Niedermeyer and Lopes da Silva, 2005). However, other features  
35 of EEG/LFP signals such as the slope, polarity and latency to events are equally  
36 important (Modi and Sahin, 2017). While interpreting neurophysiological signals is  
37 strongly influenced by this heuristics, methodological issues limit further advances.

38 During memory consolidation and retrieval, the hippocampal system releases short  
39 memory traces in the form of neuronal sequences (Hannah R Joo and Frank, 2018;  
40 Pfeiffer, 2017; Pfeiffer and Foster, 2015). Such activity comes often in tandem with  
41 spatially segregated oscillations (100-250 Hz) and LFP deflections dubbed sharp-wave  
42 ripples (Buzsáki, 2015). They result from active recruitment of dedicated cell-type  
43 specific microcircuits (de la Prida, 2020; Stark et al., 2014; Valero et al., 2015). SWR-  
44 associated sequences can either replay previous experience or preplay internal  
45 representations (Foster, 2017; Hannah R. Joo and Frank, 2018), making their  
46 automatic detection crucial to understand memory function. However, while spectral-  
47 based filters have permitted real-time SWR-related interventions (Fernández-Ruiz et  
48 al., 2019; Girardeau et al., 2009; Jadhav et al., 2012), these methods fail to  
49 disambiguate the underlying variability of a wealth of events. Moreover, with the advent  
50 of ultra-dense recordings, the need for automatic identification is pressing. In spite of  
51 recent advances (Dutta et al., 2019; Hagen et al., 2021), current solutions still fall short  
52 in capturing the complexity of SWR events across hippocampal layers.

53 Here, we exploit the extraordinary capability of Convolutional Neural Networks (CNN)  
54 for real-time recognition to identify SWR (Bai et al., 2018). Instead of adopting standard  
55 approaches used for temporal data such as in speech recognition, we chose to rely on  
56 unfiltered LFP profiles across hippocampal strata as individual data points making up  
57 an image. The one-dimensional object is equivalent to a clip of one-row pixels with as  
58 many colors as LFP channels. We show how one-dimensional CNN operating over  
59 high-density LFP hippocampal signals overcome spectral methods in detecting SWR.  
60 Moreover, we develop a strategy to decode and explain CNN operation. In doing so,  
61 we discovered some features of SWR that permit their detection at distant layers when  
62 applied to Neuropixels recordings (Jun et al., 2017). Using these tools allow for a more  
63 comprehensive interpretation of SWR signatures across the entire hippocampal  
64 system.

65

## 66 Results

### 67 *Artificial neural network architecture and operation*

68 Inspired by You-Only-Look-Once (YOLO) networks for real-time object recognition  
69 (Redmon et al., 2015), we adapted a CNN architecture to search for SWR in the dorsal  
70 hippocampus of awake head-fixed mice. LFP signals acquired with high-density 8-  
71 channel silicon probes provide detailed information about the underlying CA1  
72 microcircuit (Fig.1A) (Mizuseki et al., 2011; Navas-Olive et al., 2020). The goal of the  
73 artificial network operating over 8-channel input signals (downsampled at 1250 Hz) was  
74 to provide a single-output probability for the occurrence of a SWR event in a given  
75 temporal window (Fig.1A, bottom trace). Therefore, the input “object” is equivalent to a  
76 stream of pixels (1 x number of data samples) with 8-channels instead of colors.

Convolutional layers search for particular features in the input data by using kernels. The kernels of the first layer (L1) have dimensions of 8-channels x length, with length reflecting the number of data samples. They advance along the temporal axis moving forward a similar number of non-overlapping samples defined by the stride (Fig.1B). The result of this operation is the kernel activation signal, which reflects the presence of some input features. L1 kernel length should be defined by considering the desired output resolution of the network. To ease subsequent online applications, we chose either 32 ms (CNN32, L1 kernel length 5) or 12.8 ms resolution (CNN12, L1 kernel length 2).

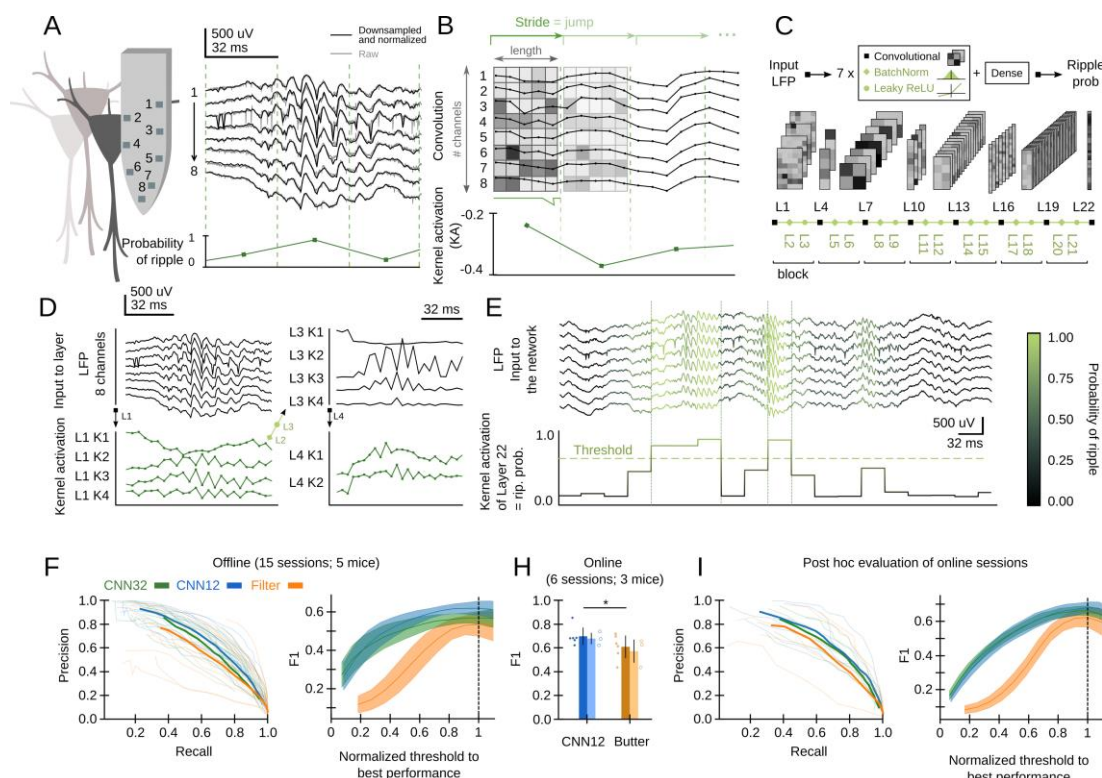

**Fig.1. CNN definition and operation.** **A**, Example of a SWR event recorded with 8-channel silicon probes in the dorsal CA1 hippocampus of head-fixed awake mice. Vertical lines mark the analysis window (32 ms). The probability of SWR event is shown at bottom. **B**, Example of L1 kernel operation and calculation of the kernel activation (KA) signal. **C**, Network architecture consists of 7 blocks of one Convolutional layer + one BatchNorm layer + one Leaky ReLU layer each (Layers 1 to 21). Dense Layer 22 provides the CNN output as the SWR probability. **D**, Examples of kernel activations for layers 1 to 4 resulting from the SWR event shown in A. Note how the 8-channel LFP input is progressively transformed to capture different features of the event. **E**, Example of the CNN output (i.e. kernel activation of layer 22) at 32 ms resolution. A probability threshold can be used to identify SWR events. Note some events can be predicted well in advance. **F**, Offline P-R curve (mean is dark; sessions are light) (left), and F1 score as a function of normalized thresholds for the CNN at 32 and 12.8 ms resolution as compared with the Butterworth filter (right). Data reported as mean  $\pm$  95% confidence interval for sessions (n=15 sessions; n=5 mice). **H**, Online detection performance of CNN12 as compared with the Butterworth filter (n=6 sessions, n=3 mice; p=0.033). **I**, Mean and per session P-R curve (left), and F1 score as a function of the optimized threshold for online sessions, as analyzed post-hoc (right). Data from n=6 sessions from 3 mice.

Our CNN operates by receiving the 8-channels input into each of the four kernels of L1 (Fig.1C). Kernels process the LFP and output a kernel activation signal (Fig.1D). Therefore, after passing through L1, the 8-channels are transformed into 4-channels, one per kernel (e.g. L1K1, L1K2, etc.). L1 output is then transformed by a Batch Norm layer (L2), and a Leaky ReLU layer (L3), before entering the next block (L4-L5-L6 and so on; Fig.1C). The size of subsequent kernels is defined by the input data from the

convolutional layers of the previous block (see Methods). Inspired by YOLO, we staggered blocks with kernels of large and short length to allow for alternate convolution of the temporal and channel axes. As data are processed along these blocks, resolution decreases and hence the kernel length becomes progressively shorter.

We defined a suitable number of blocks that optimized the input (8 channels) and output features (1 channel output at 32 ms or 12.8 resolution), resulting in 7 blocks for a total of 21 layers (Fig.1C). The final layer (L22) is a Dense Layer with a sigmoidal activation function, so that the CNN output (between 0 and 1) can be interpreted as the SWR probability. A SWR event can be detected using an adjustable probability threshold (Fig.1E). Note that our CNN network operates along all streamed LFP data without any specification of the ongoing oscillatory state (i.e. theta or non-theta segments accompanying running and immobility periods, respectively).

### ***CNN performance offline and online***

Having defined the main network architecture, we used a dataset manually tagged by an expert for training and initial validation (1794 events, 2 sessions from 2 mice; Sup.Table.1). An important decision we made was manually annotating the start and the end of the SWR event so that the CNN could learn recognizing them early from the onset.

Given the large number of parameter combinations, we run two optimization rounds using training and test chunks from the previous dataset. We first tested a subset of hyper-parameters to look for the 10-best networks (Fig.S1A, green shaded), and chose the one with the lower and more stable learning curve (Fig.S1B, arrowhead). Stabilization of the loss function error for the training and test subsets along epochs excluded potential overfitting (Fig.S1B, inset). A subsequent hyper-parameter search (781 combinations) confirmed that the trained model was in the top-30 group (Fig.S1C). The trained model is accessible at the Github repository: <https://github.com/RoyVII/cnn-ripple>. Code visualization and detection is shown in an interactive notebook <https://colab.research.google.com/github/RoyVII/cnn-ripple/blob/main/src/notebooks/cnn-example.ipynb>

We assessed the offline performance of the chosen CNN, as compared to a Butterworth filter as the gold-standard, using additional tagged sessions never used for training (5695 events from n=15 sessions from 5 mice; Sup.Table.1). Performance was evaluated by calculating the precision (P, proportion of correct predictions over all predictions), recall (R, proportion of correct predictions over ground truth events, also known as sensitivity) and F1 values (harmonic mean of precision and recall). The P-R curve depicted better offline operation of both the CNN12 and CNN32 as compared with the Butterworth filter (Fig.1F, left). When we considered the relationship between performance and the detection threshold, we found that the CNN exhibited a more robust performance as well (Fig.1F, right). To make the CNN and the filter thresholds comparable, we normalized their values by the best threshold performance. Of note, this offline analysis was possible because the ground truth was already known. In a real case scenario, the experimenter has to rely in relatively arbitrary threshold settings.

To evaluate this further, we performed a new set of experiments for real-time detection in the Open Ephys (OE) environment (Siegle et al., 2017) (6 sessions from 3 mice). To this purpose, we developed a plugin designed to incorporate TensorFlow, an open-



source library for machine learning applications, into the OE graphic user interface (Fig.S1D,E; Sup.Table.1). To be consistent with detection standards (Fernández-Ruiz et al., 2019), the online filter was applied to the channel with maximal ripple power and an additional non-ripple channel was used to veto detection of common artifacts. We found better online performance of the CNN at 12.8 ms resolution as compared with the filter (Fig.1H;  $p < 0.033$ ). When it came to the ability to anticipate SWR events online, the CNN slightly overtook the Butterworth filter (time-to-SWR-peak for CNN12:  $-6.6 \pm 1.9$  ms; Butterworth filter:  $-4.2 \pm 2.3$  ms; Mann-Whitney U test,  $p < 0.00001$ ). A post hoc evaluation of online sessions confirmed a better performance of the CNN versus the filter, for all normalized thresholds (Fig.1I).

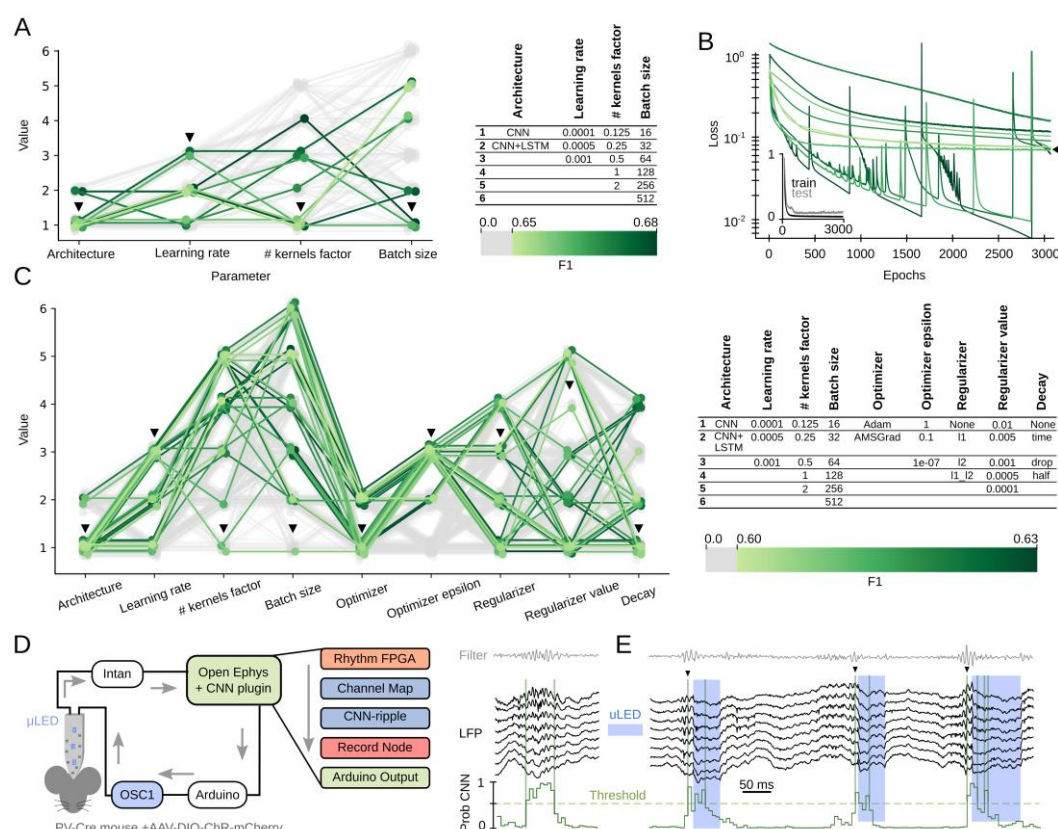

**Fig.S1. Network definition and parameters.** **A**, Preliminary evaluation of two different architectures, CNN and long short-term memory (LSTM) networks, as well as different learning rates, number of kernels factor and batch sizes. The resulting 10-best networks exhibited performance  $F1 > 0.65$  (green scale) at 32 ms resolution. Arrowheads indicate CNN32. Worst performance networks are shown in gray. **B**, Evolution of the loss value during training of the 10-best networks shown in A. CNN32 exhibited the lower and more stable learning curve (arrowhead). The inset shows evolution of the loss function error across epochs for the training and test subsets, excluding overfitting issues. **C**, Extended hyper-parameter search for different optimization algorithms (Adam and AMSGrad), regularizing strategies and the learning rate decay (781 parameter combinations). F1 values of the 30-best networks are shown (green values). Worst performance networks are in gray. Arrowheads indicate the trained model. **D**, Scheme of the experimental setup for online detection. CNN operated in real time at the interface between the Intan recording system and the controller of an opto-electrode probe. A SWR event (right) illustrates detection over threshold. Detection was implemented using a plugin designed to incorporate TensorFlow into the OE GUI <https://github.com/RoyVII/CNNRippleDetectorOEPlugin> **E**, Example of an online closed-loop intervention (blue shadow) in a PV-cre mouse injected with AAV-DIO-ChR2 to optogenetically modulate SWR.

## Detection limits of SWR and CNN operation

Are there any practical detection limit for SWR? How good is CNN performance and how much is it determined by the expert heuristics? First, we sought to compare CNN

and the filter at its maximal capability using data from all sessions (21 sessions from 8 mice). To this purpose, we equated the methods using the best possible detection threshold for each session (the one that optimized F1) and found roughly similar values (Fig.2A; CNN12:  $F1=0.68 \pm 0.06$ ; CNN32:  $F1=0.63 \pm 0.05$ ; Butterworth filter:  $F1=0.65 \pm 0.11$ ). Remarkably, the filter exhibited larger variability across sessions. Our CNN performed similar to a filter-based optimized algorithm ( $F1=0.66 \pm 0.11$ ) (Dutta et al., 2019), but significantly better than RippleNET, a recurrent network designed to detect SWR mostly during periods of immobility ( $F1=0.31 \pm 0.21$ ;  $p<0.00001$  one-way ANOVA for comparisons with both CNN12 and CNN32) (Hagen et al., 2021). This supports similar operation of CNN as compared with the gold standard in conditions when optimized detection was possible.

The use of supervised learning for training and posterior validation requires using datasets annotated by experts. However, the expert's opinion may be influenced by the recording method, the experimental goal and the existing knowledge. To evaluate the impact of these potential biases, we used the ground truth from a second expert in the lab (2798 events,  $n=11$  sessions, 5 mice). While results were overall comparable, there were some natural differences between experts in a session-by-session basis (Fig.2B). Interestingly, when we confronted the network detection with the consolidated ground truth, we noted that the CNN could be actually detecting many more SWR events than initially accounted by each individual expert (one-way ANOVA, CNN12:  $F(2)=4.75$ ,  $p=0.016$ ; CNN32:  $F(2)=4.22$ ,  $p=0.024$ ). In contrast, the filter failed to exhibit such an improvement (Fig.2B). Notably, an expert acting as a classifier of the other expert's ground truth provided a mean reference of best performance at  $0.69 \pm 0.14$  (Fig.2C).

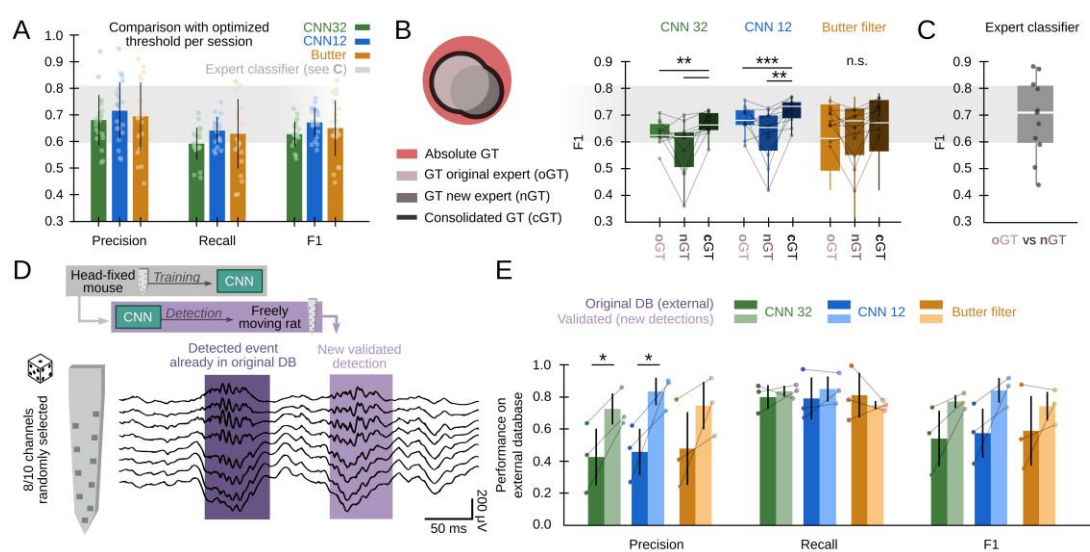

**Fig.2. Effects of different experts' ground truth on CNN performance.** **A**, Comparison between the CNN and Butterworth filter using thresholds that optimized F1 per session (21 recordings sessions from 8 mice). Note this optimization process can only be implemented when the ground truth is known. **B**, A subset of data annotated independently by two experts was used to evaluate the ability of each method to identify events beyond the individual ground-truth. The original expert provided data for training and validation of the CNN. The new expert tagged events independently in a subset of sessions (11 sessions from 5 mice). The performance of CNN, but not that of the filter, was significantly better when confronted with the consolidated ground truth. Significantly as tested with one-way ANOVA for each method; Paired t-tests \*\*,  $p<0.01$ ; \*\*\*,  $p<0.001$ . **C**, Performance obtained from the experts' ground truth when acting as a mutual classifier ( $n=11$  sessions). Note this provides an estimation of the maximal performance level. **D**, We used the hc-11 dataset (Grosmark and Buzsáki, 2016) at the CRCNS public repository (<https://crcns.org/data-sets/hc/hc-11/about-hc-11>) to evaluate the effect of the definition of the ground truth. The data consisted in 10-channel high-density recordings from the CA1 region of freely moving rats. We randomly selected 8-channels to cope with inputs dimension of our CNN, which was not retrained. The dataset comes with annotated SWR events (dark shadow) defined by stringent criteria (coincidence of

both population synchrony and SWR). CNN False Positives defined by this partially annotated ground truth were re-reviewed and validated (light shadow). **E**, Performance of the original CNN, without retraining, at both temporal resolutions over the originally annotated (dark colors) and after False Positives validation (light colors). Performance of the Butterworth filter is also shown. Data from 3 sessions, 2 rats. See Supp.Table 1.

To evaluate this point further, and to test the capability of the CNN to generalize beyond its original training using head-fixed mice data, we used an externally annotated dataset of SWR recorded with high-density silicon probes from freely moving rats (Grosmark and Buzsáki, 2016) (Fig.2D; 1056 events; 3 sessions from 2 rats; Sup.Table.1). In that work, SWR detection was conditioned on the coincidence of both population synchrony and LFP definition thus providing a “partial ground truth”. Consistently, the network recalled most of the annotated events ( $R=0.80 \pm 0.18$ ), but precision was apparently low ( $P=0.42 \pm 0.18$ ) (Fig.2E). Hence, we evaluated all False Positive predictions and found that many of them were actually unannotated SWR (839 events), meaning that precision was actually higher ( $P=0.72 \pm 0.12$  for CNN32,  $P=0.83 \pm 0.10$ ; for CNN12, both at  $p<0.05$  for paired t-test; Fig.2E). As above, the filter failed to improve performance (Fig.2E). Importantly, a CNN trained in data from head-fixed mice was able to generalize to freely moving rats.

Altogether, this analysis indicates that detection limits of SWR may be determined by the expert’s criteria. CNN performance improves when confronted with the extended ground truth, suggesting that it learns to generalize beyond existing data.

## ***Unveiling SWR latent features***

Interpretability is a major issue in modern machine learning (Mahendran and Vedaldi, 2014; Richards et al., 2019). To better understand and validate CNN operation, we looked for methods to visualize the kernel features that had better explained the network ability to recognize SWR events. We exploited a standard procedure from CNN image recognition (Simonyan et al., 2013) consisting on maximizing the kernel activation using gradient ascent in the input space (Fig.3A, top). To this purpose, a noisy LFP input is progressively updated until the kernel activation is maximal, using different initialization values (Fig.3A, bottom). The resulting signal is equivalent to a saliency map reflecting the latent preferred features by each CNN kernel. This approach is similar to infer visual receptive fields using noise stimulation.

Similar as 2-dimensional CNN layers specialize in detecting edges, shapes and textures of an image, we found the kernels focused in detecting distinct LFP features. Consistently with data above, kernels from the first layers specialized in detecting rhythmic and periodic patterns (e.g. L1K1 and L1K2), while later layers seem to focus in identifying these patterns along time (e.g. L19K18; Fig.3B). By computing the pattern-matching function between saliency maps and the 8-channels LFP, we evaluated how the kernels accounted for different features of True Positive events, i.e. SWR (Fig.3C). For example, L1K1 was maximally activated at the peak of ripple oscillations, while L1K2 and L19K18 were maximal at the onset, supporting the network ability to anticipate SWR. Pattern-matching between true SWR events and the saliency map of the output layer L22 provided an idea of what the CNN recognized as an ideal “object”. In contrast, pattern-matching values in the absence of SWR events (True Negative events) were typically lower as compared with those obtained from the ground truth (Fig.3D).



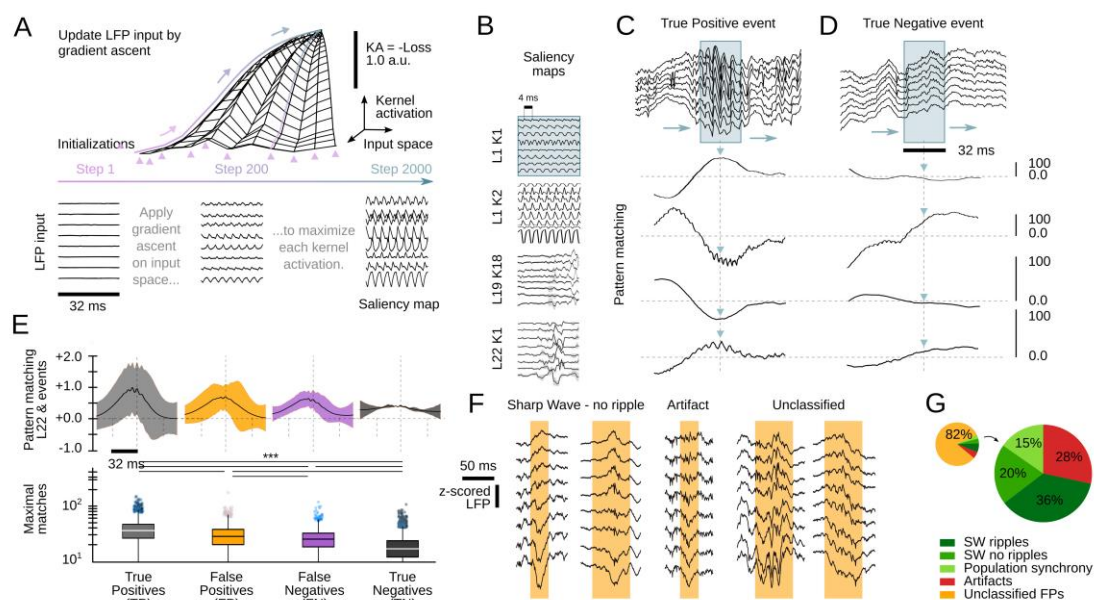

**Fig.3. Analysis of the CNN kernel saliency maps.** **A**, Schematic illustration of the method to calculate the kernel saliency maps using gradient ascent. Note that different initializations converge to the same solution. **B**, Examples of saliency maps from some representative kernels. Note ripple-like preferred features of L1 kernels and temporally specific features of L19 and L22 kernels. **C**, Pattern-matching between saliency maps shown in **B** and LFP inputs of the example SWR event (120 ms window). **D**, Same as in **C** for a True Negative example event. **E**, Mean template-matching signal (top) and maximal values (bottom) from all detected events classified by CNN32 as True Positive (4385 events), False Positives (2468 events), False Negatives (3055 events) and True Negatives (4902 events). One-way ANOVA,  $F(3)=1517$ ,  $p<0.0001$ ; \*\*\*,  $p<0.001$  after correction by Bonferroni. **F**, Examples of False Positive detections. Note some of them are sharp waves without ripples and population firing synchrony. Also note artifacts superimposed to LFP deflections and many unclassified events reflecting different oscillatory components. **G**, Distribution of False Positive Events per categories.

To quantify these observations, we evaluated how much of the output L22K1 saliency maps matched to different input events, using data from the training and offline validation sessions (17 sessions, 7 mice). Consistent with the examples, pattern-matching was maximal for True Positive and minimal for True Negative events (one-way ANOVA,  $F(3)=1517$ ,  $p<0.0001$ ). Pattern-matching values were higher for False Positives than for False Negatives (Fig.3E), meaning that the network may be identifying some latent features. A closer examination of False Positive predictions suggested that about 20% of them could be reclassified. From these, about one third were sharp waves without clear associated ripples (SW no ripples), while others were actually SWR events, synchronous population firing and artifacts (Fig.3F,G). Strikingly, many of the unclassified events resembled spatially widespread network oscillations coupled to LFP deflections (Fig.3F, rightmost), suggesting they may represent different types of sub-threshold network activities (de la Prida et al., 2006). Finally, False Negative events were essentially SWR with different polarities and deflection trends (output probability  $0.42 \pm 0.44$ ).

This analysis confirms that the CNN has the ability to identify SWR events by relying on feature-based kernel operation. Moreover, some predictions not consistent with the current definition of SWR may identify different forms of population firing and oscillatory activities associated to sharp-waves, supporting the network ability to generalize beyond the expert ground truth.



## Interpreting and explaining CNN operation

As shown above, the CNN ability relies on feature extraction by the different kernels. To gain explanatory power on how this applies to SWR detection, we sought to visualize and quantify the CNN kernel operation.

First, we examined the weights of the first layer kernels, which act directly over high-density LFP inputs. We noted that their profiles were especially suited for assessing critical LFP features, such as the laminar organization of activity. For example, L1K1 seemed to act along the spatial scale by differentially weighting LFP channels along the somatodendritic axis and deep-superficial layers (Fig.4A), consistent with the saliency map shown above. In contrast, weights from L1K2 likely operated in the temporal scale with major differences along the kernel length (Fig.4A). In this case, by positively weighting upper channels at later samples this filter may help to anticipate some SWR motifs as shown before (see Fig.3C). Interestingly, there were opposing trends between top and bottom channels, suggesting some spatial effect as well. L1K3 and L1K4 provided less obvious integration across the spatial and temporal scales. In spite of the complexity of the resulting convolution along the entire event, visualization of their activation traces reflects detection of ripples as well as the slow and fast deflections of the associated sharp wave (see L1 outputs in Fig.1D for CNN32; Fig.S2A,B for CNN12).

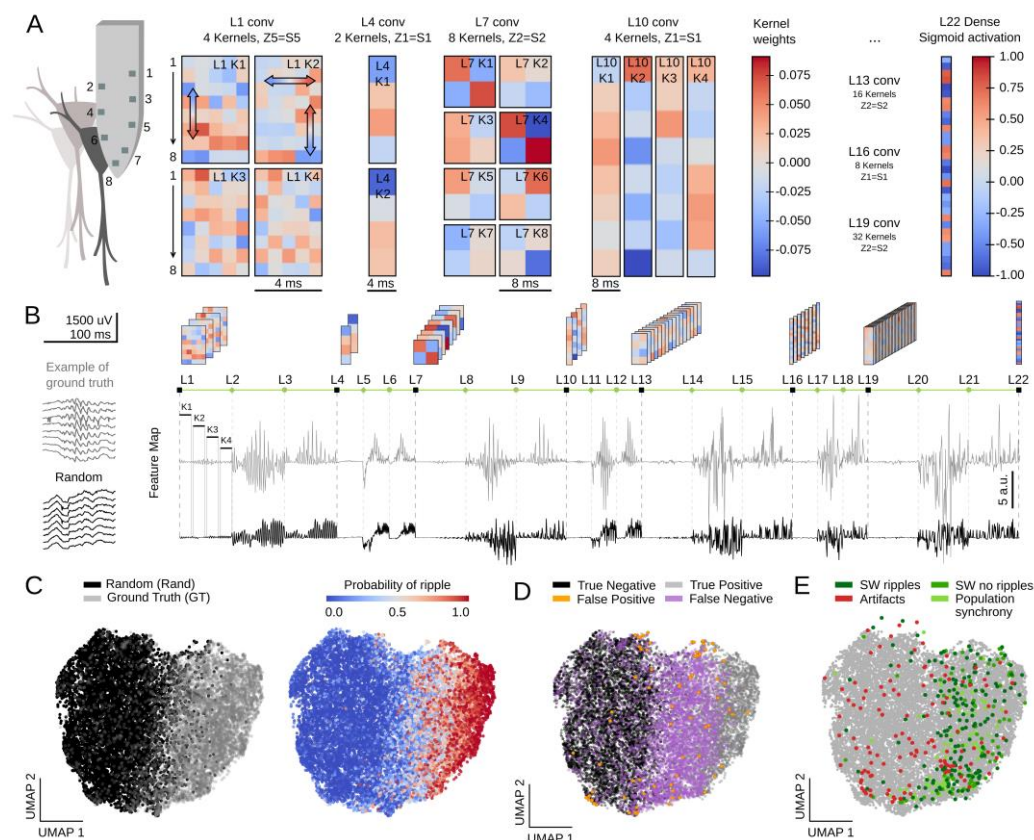

**Fig.4. Feature map analysis of CNN32 operation.** **A**, Examples of kernel weights from different layers of CNN32. Note different distribution of positive and negative weights. In layer 1, the four different kernels act to transform the 8-channels input into a single channel output by differently weighting contribution across the spatial (upper and lower LFP channels; vertical arrows in L1K1 and L1K2) and temporal scales (horizontal arrow in L1K2). See the resulting kernel activation for the example SWR event in Fig.1D. **B**, Feature map from the example SWR event (100 ms window; gray) built by concatenating the kernel activation signals from all layers into a single vector. The feature map of a randomly selected LFP epoch without annotated SWR is shown at bottom (black). **C**, Two-dimensional reduced visualization of CNN32 feature maps using UMAP shows clear segregation between similar number of SWRs (ground truth, GT)

and randomly chosen LFP epochs (Rand) (7491 events, sampled from 17 sessions, 7 mice). Note distribution of SWR probability at right consistent with the ground truth. **D**, Distribution of True Positive, True Negative, False Positive and False Negative events in the UMAP cloud. **E**, Distribution of the False Positive events previously validated in Fig.2G. Note they all lay over the ground truth region.

The same reasoning applies to the next layers. However, since CNN acts to transform an LFP 'object' into a probability value, the spatial and temporal features of SWR events become increasingly abstract. Notwithstanding, their main features are still recognized. For example, L4K1 and L4K2 outputs likely reflected the spatiotemporal organization of the input SWR event, in particular the slower components and uneven distribution of ripples (see Fig.1D and Fig.S2A).

To quantify these observations we evaluated how the different kernels were activated by a similar number of LFP events centered at either the ground truth or at a random timing (Fig.4B, 7491 events in each category; data from both the training and test offline sessions). For each window, we concatenated the resulting kernel activations from all layers in a single vector, dubbed feature map (Fig.4B; length 1329 for CNN32, 3991 for CNN12). Since each layer generates a characteristic activity in response to input data, we reasoned that features maps should carry information on the network representation of a particular LFP event.

We used Uniform Manifold Approximation and Projection (UMAP), a computationally efficient dimensionality reduction and visualization tool, to explore feature maps. UMAP successfully segregated feature maps of LFP events according to their detection probability in a 2-dimensional cloud (Fig.4C; Fig.S2C), supporting that the entire CNN is coding for different features of SWR across layers (Fig.S2D).

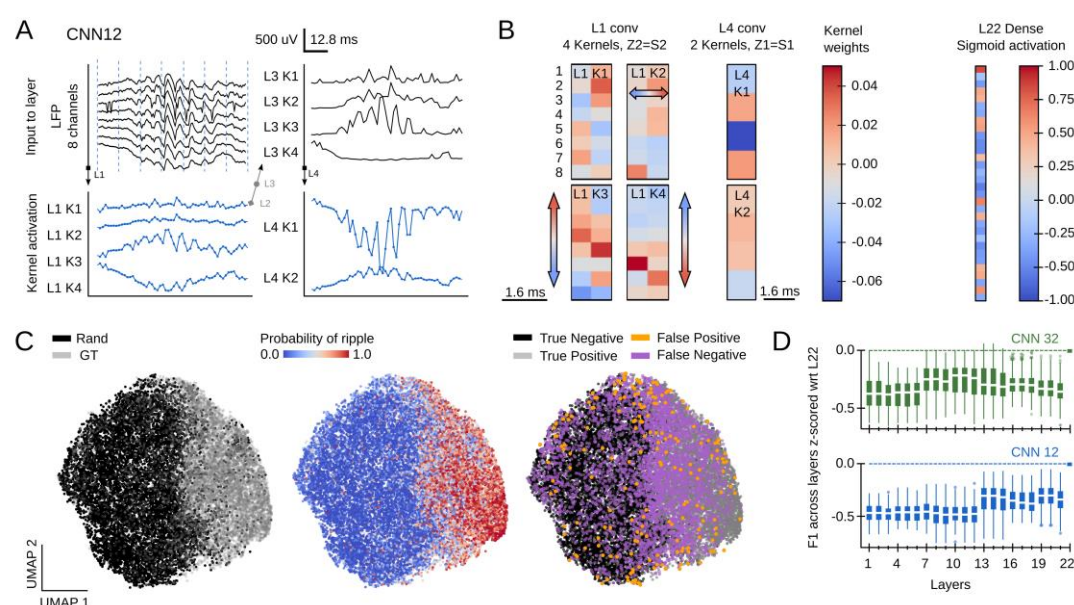

**Fig.S2. Feature map analysis of CNN12 operation.** **A**, Examples of CNN12 kernel activations for layers 1 to 4 resulting from the example SWR event. Note how the 8-channel LFP input is progressively transformed to capture different features of the event at a higher resolution as compared with CNN32 (see Fig.1D). **B**, Examples of CNN12 kernel weights. As for CNN32 (Fig.4A), note different distribution of positive and negative weights across the spatial and temporal scales. **C**, UMAP plot of the CNN12 feature maps shows clear segregation between similar number of SWRs (ground-truth, GT) and randomly chosen LFP epochs (Rand) (7491 events from 17 sessions, 7 mice). The distribution of SWR probability is shown next, as well as the distribution of all detected events by categories. **D**, Performance (F1) evaluated for each CNN layer at both temporal resolutions (data from 17 sessions, 7 mice).

We labeled each LFP event in UMAP coordinates as True Positive (detected ground truth events), False Positive (Rand events detected as SWR), False Negative (undetected ground truth) and True Negative (unannotated and undetected events). We found striking segregation across the UMAP cloud with True Positive and True Negative events falling apart (Fig.4D; Fig.S2C). False Negatives were mostly located at the intermediate region, suggesting they could be detected with less conservative thresholds. Interestingly, False Positive predictions were scattered all around the cloud, supporting the idea that they reflect heterogeneous events as seen above. Mapping all the previously validated False Positive events (see Fig.3F,G) over the UMAP cloud confirmed that those corresponding to population synchrony and sharp-waves without ripples distributed over the ground truth, while those corresponding to artifacts mostly fell apart (Fig.4E).

Altogether, these analyses permitted us to understand how the one-dimensional CNN operates to detect SWR events. Our study suggests that a CNN relying on feature-based detection allows to capture a wider diversity of SWR events, in contrast to spectral filtering. The new method could potentially facilitate discovery and interpretation of the complex neurophysiological processes underlying SWR.

### ***Leveraging CNN capabilities to interpret SWR dynamics***

Equipped with this tool we sought to understand the dynamics of SWR across the entire hippocampus. To this purpose, we obtained Neuropixels recordings from different rostro-caudal penetrations in head-fixed mice (Fig.5A; n=4 sessions, 4 mice; Sup.Table.1). Detailed post-hoc histological analysis validated the probe tracks passing through a diversity of brain regions, including several thalamic nuclei as well as the dorsal and ventral hippocampus (Fig.5B, Fig.S3A).

By exploiting the ultra-dense configuration of Neuropixels, we simulated consecutive penetrations with 8-channel high-density probes covering the entire dorsoventral axis (Fig.5A). We run offline detection using eight neighboring Neuropixels channels as the inputs, then move four channels downward/upward and repeat detection again, up to the end of the probe. We used the original CNN32 without retraining, the Butterworth filter and RippleNET to evaluate detection performance against the ground truth.

Consistent with data above, we found successful detection of SWR events from the dorsal CA1 region (Fig.5A). While detection was optimal at the CA1 cell layer (stratum pyramidale; SP), we noted many events were actually identified from SWR-associated LFP signatures at the radiatum (SR) and lacunosum-moleculare (SLM) layers (Fig.5C; Fig.S3B). When evaluated per layer, detection of SWR was better at the dorsal than at the ventral hippocampus, except for SR and SLM (Fig.5D, left). We found no major differences except for precision, when all layers were pooled together (Fig.5D, right).

In spite that only a subset of SWR could be identified from recordings at SR and SLM (i.e. R-values were low), precision was very high (i.e. over 80% of predictions were consistent with the ground truth). A close examination of the morphology of these events confirmed they exhibited LFP and oscillatory features consistent with the kernel saliency maps (Fig.5E, Fig.S3C). Remarkably, both the Butterworth filter and RippleNET failed to identify SWR associated signatures beyond the dorsal SP (Fig.S3D,E).



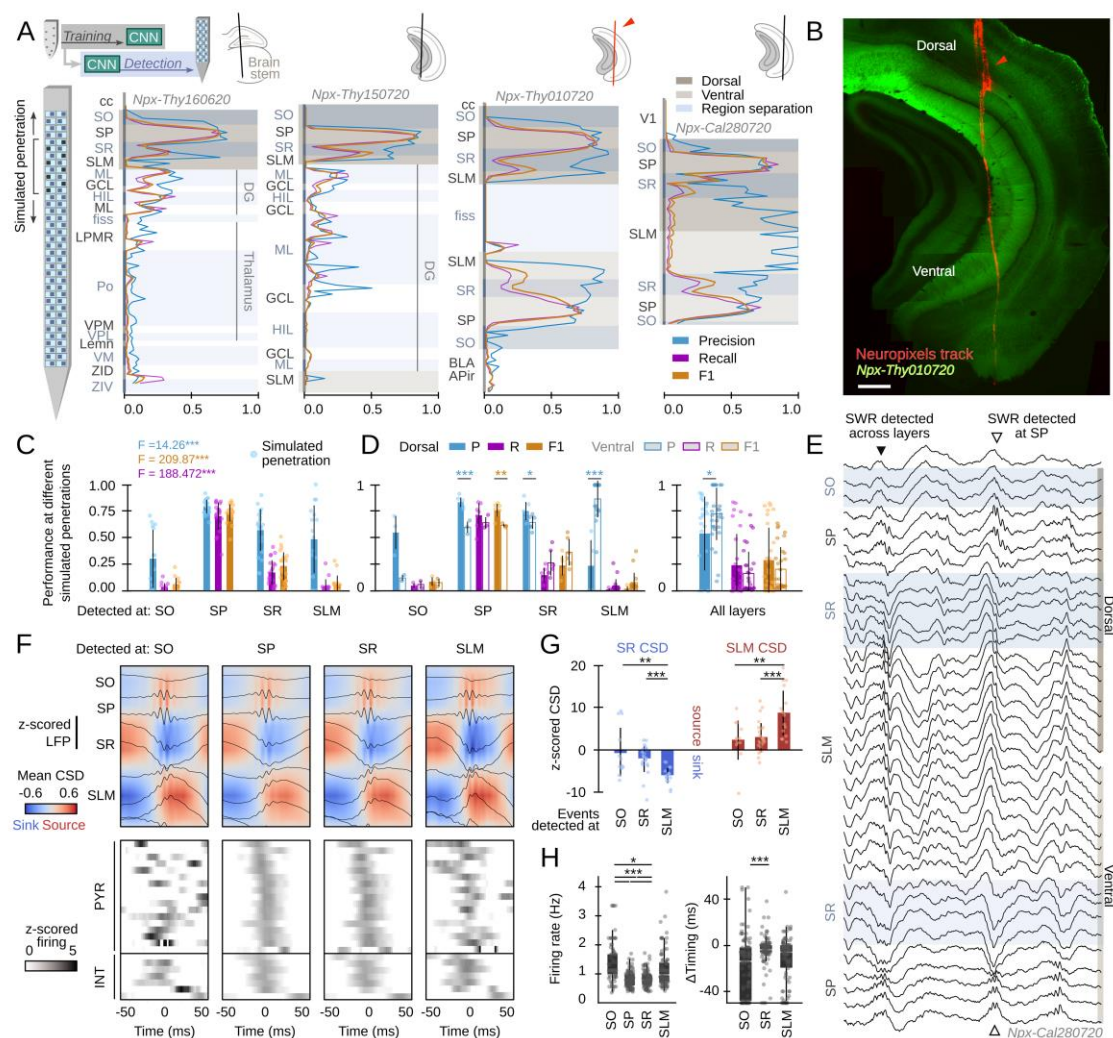

**Fig.5 Hippocampus-wide SWR dynamics through the lenses of CNN.** **A**, Neuropixels probes were used to obtain ultra-dense LFP recordings across the entire hippocampus. Offline detection was applied over continuous simulated penetrations (8-channels). Detection performance is evaluated across brain regions and hippocampal layers using the CNN trained with a different electrode type. **B**, Histological validation of one of the experiments shown in **A** (red arrowhead). **C**, Performance of CNN32 across hippocampal layers (96 dorsal simulated penetrations, 4 mice). The results of an independent one-way ANOVA for P, R and F1 is shown separately. \*\*\*,  $p < 0.001$ . **D**, Dorsoventral differences of CNN32 performance across layers. P, R and F1 values from dorsal and ventral detection were compared pairwise (55 dorsal and 55 ventral simulated penetrations, 4 mice). \*,  $p < 0.05$ ; \*\*,  $p < 0.01$ ; \*\*\*,  $p < 0.001$ . **E**, Example of a SWR detected across several layers (black arrowhead). Note ripple oscillations all along the SR and SLM. A SWR event which was only detected at SP dorsal and ventral is shown at right (open arrowhead). **F**, Mean LFP and CSD signals from the events detected at different layers of the dorsal hippocampus of mouse Npx-Thy160620 (top). Bottom plots show the SWR-triggered average responses of pyramidal cells and interneurons. Cells are sorted by their timing during SWR events detected at SP. **G**, Quantification of the magnitude of the SR sink and SLM source for events detected at SO, SR and SLM, as compared against SP detection. One-way ANOVA SR CSD:  $F(2)=9.13$ ,  $p=0.0004$ ; SLM CSD:  $F(2)=9.64$ ,  $p=0.0003$ ; \*\*,  $p < 0.01$ ; \*\*\*,  $p < 0.001$ . **H**, Quantification of changes of firing rate and timing of pyramidal cells during SWR detected at different layers. Firing rate:  $F(3) = 28.68$ ,  $p < 0.0001$ ; \*,  $p < 0.05$ ; \*\*\*,  $p < 0.001$ . Timing:  $F(2) = 10.18$ ,  $p < 0.0001$ ; \*\*\*,  $p < 0.0001$ .

To gain insights into the underlying physiology and to discard for potential volume conduction effects, we simulated linear penetrations through the dorsal hippocampus and estimated the associated current-source density (CSD) signals of events detected at different layers (Fig.5F, top). We found larger sinks and sources for SWR that can be detected at SLM and SR versus those detected at SP only (Fig.5G). We also exploited



Neuropixels to isolate activity from putative pyramidal cells (n=99) and interneurons (n=29, all penetrations) during the different SWR event types (Fig.5F, bottom). For pyramidal cells, we found striking reorganization of the firing rate and timing during SWR detected at SO, SR and SLM versus those detected only at SP (Fig.5H). Interneurons exhibited similar variability (Fig.S3E). Timing and rate differences of pyramidal cell and interneuronal firing with respect to SWR events detected at different layers support the idea that they reflect activation of different hippocampal ensembles. Our CNN thus provide unique opportunities to study the so far elusive dynamics accompanying SWR responses.

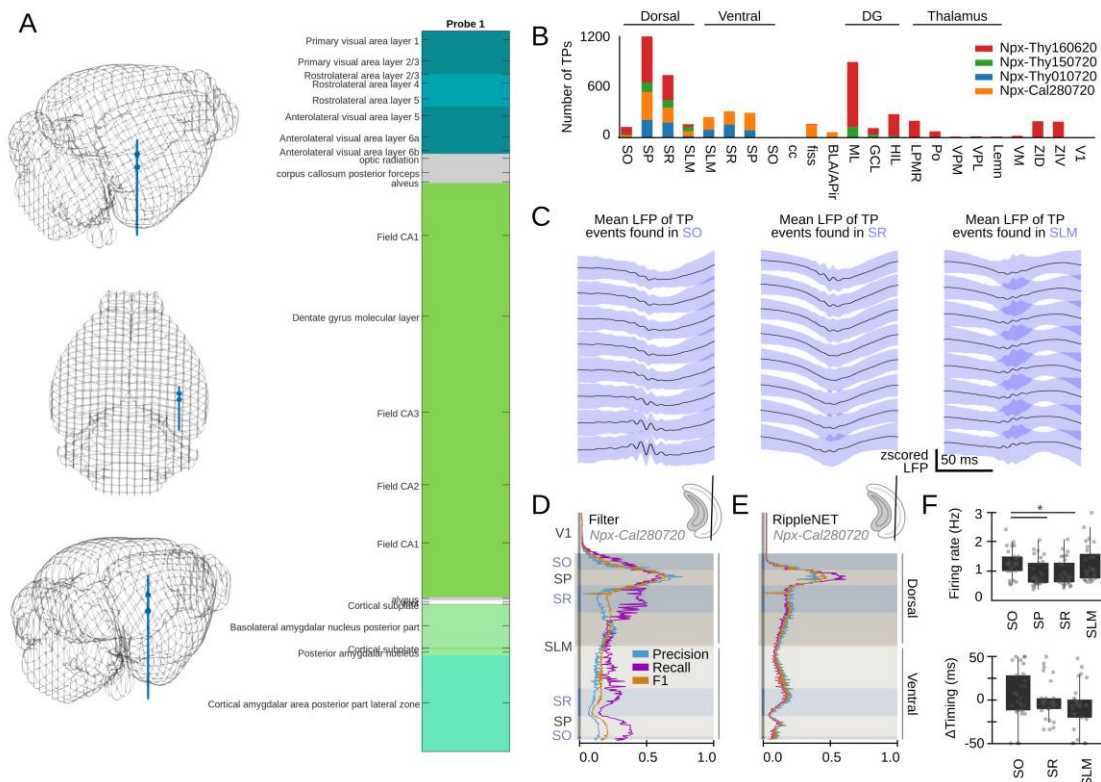

**Fig.S3 CNN detection of SWR from ultra-dense Neuropixels recordings.** **A**, Detailed post-hoc histological analysis with SHARP-Track (Shamash et al., 2018) allowed identifying a diversity of brain regions pierced by the Neuropixels probe. The different brain regions were annotated and confronted with the Paxinos atlas. **B**, Distribution of True Positive events detected by CNN32 across layers and regions of the 4 different mice. **C**, Mean LFP of True Positive events detected by CNN32 at SO, SR and SLM of the example shown in Fig.4F. Note sharp waves and ripples are differentially visible at these layers. **D**, Detection performance of the Butterworth filter across hippocampal layers for mouse Npx-Cal280720. See the same session analyzed by CNN32 at the rightmost plot of Fig.4A. **E**, Detection performance of RippleNET across hippocampal layers for mouse Npx-Cal280720. Same session as in D and at the rightmost plot of Fig.4A. **F**, Quantification of changes of the firing rate and timing of putative GABAergic interneurons during SWR detected at different layers. Firing rate:  $F(3) = 3.89$ ,  $p = 0.011$ ; \*,  $p < 0.05$ . Timing: not significant.

## Discussion

Here, we report how one-dimensional convolutional networks operating over high-density LFP recordings allows for unprecedented detection and interpretation of hippocampal SWR events. While the network was trained in a subset of LFP data recorded around the dorsal CA1 cell layer of head-fixed mice, detection generalized across strata, brain locations (e.g. ventral hippocampus), preparations (i.e. freely moving) and species (i.e. rats). Our CNN exhibited a much higher stability, less

threshold-dependent sensitivity and overall higher performance as compared with the spectral filter and RippleNET, a recurrent neural network solution. This unique capability of our CNN relies on feature-based analysis of LFP signals, which provide similar explanatory power as standard LFP profiling. Such a developmental potential of convolutional neural networks permits challenging the interpretation of brain signals (Frey et al., 2021), and SWR in particular (this study).

From a physiological perspective, studying brain function relies in understanding activity in relation to behavior and cognition (Cohen, 2017; Friston et al., 2015). Inspired by the tradition to observe and categorize, neuroscientists require classifying EEG/LFP signals into patterns, which presumably should gain mechanistic significance at the neuronal and microcircuit levels (Buzsáki and Draguhn, 2004; G et al., 1999; Niedermeyer and Lopes da Silva, 2005). Yet, some of the most widely used classification schemes still generate debate. For instance, contributors to gamma oscillations (40-100 Hz) include fluctuating synaptic potentials reflecting inhibition, excitation or both in interaction with phase-locking firing from subsets of cells (Atallah and Scanziani, 2009; Bartos et al., 2007). The specific contribution of the different factors at the resulting dominant oscillatory frequency band is not trivial (Buzsáki and Schomburg, 2015). In addition, relying on spectral definitions to analyze EEG/LFP data has to cope with the nonstationary nature of brain activity, while the demarcation of frequency bands does not necessarily fit to unambiguous basic mechanisms. Whether this reflects the elusive emergent behavior of brain activity or methodological limitations is arguable.

We aimed exploiting machine-learning tools to transform the study of hippocampal SWR, a major neurophysiological event underlying memory trace consolidation and recall (Buzsáki, 2015). While SWR presumably entail coordinated activity of pyramidal cells and GABAergic interneurons in a mnemonically relevant sequence-specific manner (Diba and Buzsáki, 2007; Gridchyn et al., 2020; Ólafsdóttir et al., 2018; Stark et al., 2015), their physiological definition seems constrained (Buzsáki, 2015). The organization of SWR sequence firing reveals to be specific of memory demands (Foster, 2017; Hannah R Joo and Frank, 2018; van de Ven et al., 2016). Moreover, the replay content and order unfold neuronal representations in a myriad of combinations in the service for cognitive agency and flexibility (Pfeiffer, 2017). The potentially different mechanisms underlying such a representational complexity are not yet integrated into the existing heuristics (de la Prida, 2020).

When coupled to ultra-dense Neuropixels, our CNN identified subsets of SWR across different strata of the dorsal and ventral hippocampus. The ability to detect events across layers seemed to rely in a combination of features with strength and visibility of the associated current sources having major contributions. This calls for the existence of subthreshold buildup of population activities emerging from interaction between different input pathways and local microcircuits (de la Prida et al., 2006). For instance, recent data suggest pivotal role of entorhinal inputs in modulating and elongating the dynamics of locally generated SWRs (Fernández-Ruiz et al., 2019; Oliva et al., 2018; Yamamoto and Tonegawa, 2017). Similarly, SWR events disproportionally weighted by downstream inputs along the CA3 to CA2 axis differentially modulate consolidation of recognition memory at the social and nonsocial domains (Nakashiba et al., 2009; Oliva et al., 2020, 2016). Consistently, some ripples can be actually detected at SO, SR and SLM strata independently on their alleged local generation at the CA1 cell layer.

The configuration of the current sinks and sources associated to independently detected SWR events suggest that the weighted interaction between fluctuating input pathways may entail contribution by different factors across behavioral states (Buzsáki,

2015). For instance, different subcircuits may contribute to sleep and awake SWR with different cognitive roles (Roumis and Frank, 2015). The ability to detect ripple oscillations at different layers also indicate a role for dendritic potentials, such as complex spikes and dendritic bursts (Bittner et al., 2015; Kamondi et al., 1998). Finally, while attention is traditionally focused on parvalbumin (PV) and cholecystokinin (CCK) GABAergic basket cells providing perisomatic innervation (Klausberger et al., 2005), other GABAergic cells and terminals located at the border between SR and SLM may equally contribute (Basu et al., 2016; Kitamura et al., 2015; Klausberger and Somogyi, 2008). This is supported by larger current sources associated with SWR events detected at SLM layers.

Our data suggest that only one part of the dorsal SWR dynamics can be explained locally, consistent with complex interaction along the septotemporal axis (Patel et al., 2013). Instead, the CNN identify different types of SWR events detected at distant strata suggesting major role of input pathways. A segregated role for dorsal and ventral SWR events suggest that brain-wide subcircuits inherit the different representational dynamics of a variety of replays (Sosa et al., 2020). The detection unfolding of CNN thus permit an unbiased categorization without relying on more elusive spectral criteria. Critically, both the filter and RippleNET failed to capture SWR diversity across strata further confirming the suitability of CNN to capture critical LFP features accompanying a wealth of events.

Our method also identified events beyond the expert ground truth. Careful examination of those False Positives reveal sharp-waves associated to population synchronous firing without ripples, as well as other unclassified forms of oscillatory activities. While there is no specific report of these events, the ability of CA3 inputs to bring about gamma oscillations and multi-unit firing associated with sharp-waves is already recognized (Sullivan et al., 2011), and variability of the ripple power can be related with different cortical subnetworks (Abadchi et al., 2020; Ramirez-Villegas et al., 2015). Since the power spectral level operationally defines the detection of SWR, part of this microcircuit intrinsic variability may be escaping analysis when using spectral filters.

Understanding how the brain encodes for memory is challenging. Recent data suggest that replay emerging from SWR is more complex than originally thought (Hannah R Joo and Frank, 2018). Cell-type specific subcircuits operating over a variety of interneuronal classes and under the influence of different input pathways, provide mechanistic support for a wealth of SWR events (de la Prida, 2020). Yet, SWR detected by gold standard spectral methods fail to reflect the necessary statistical variance that allows for identifying specific trends. Relying on unbiased feature-based methods hopefully can change the game.

## Acknowledgements

This work is supported by grants from Fundaci3n La Caixa (LCF/PR/HR21/52410030) and the Spanish Ministry of Science (RTI2018-098581-B-I00). Access to the Artemisa high-performance computing infrastructure (NeuroConvo project) is supported by Universidad de Valencia and co-funded by the European Union through the 2014-2020 FEDER Operative Programme (IDIFEDER/2018/048). ANO and RA are supported by PhD fellowships from the Spanish Ministry of Education (FPU17/03268) and Universidad Aut3noma de Madrid (FPI-UAM-2017), respectively. We thank Elena Cid for help with histological confirmation of probe tracks and Pablo Varona for feedback and discussion. We also thanks Aar3n Cuevas for clarifications regarding Open Ephys.

573

## 574 **Competing interests**

575 No competing interests to declare

576

## 577 **References**

- 578 Abadchi JK, Nazari-Ahangarkolaee M, Gattas S, Bermudez-Contreras E, Luczak A,  
579 McNaughton BL, Mohajerani MH. 2020. Spatiotemporal patterns of neocortical  
580 activity around hippocampal sharp-wave ripples. *Elife* **9**. doi:10.7554/eLife.51972
- 581 Atallah B V., Scanziani M. 2009. Instantaneous Modulation of Gamma Oscillation  
582 Frequency by Balancing Excitation with Inhibition. *Neuron* **62**:566–577.  
583 doi:10.1016/J.NEURON.2009.04.027
- 584 Bai S, Kolter JZ, Koltun V. 2018. An Empirical Evaluation of Generic Convolutional and  
585 Recurrent Networks for Sequence Modeling.
- 586 Bartos M, Vida I, Jonas P. 2007. Synaptic mechanisms of synchronized gamma  
587 oscillations in inhibitory interneuron networks. *Nat Rev Neurosci* **8**:45–56.  
588 doi:10.1038/NRN2044
- 589 Basu J, Zaremba JD, Cheung SK, Hitti FL, Zemelman B V, Losonczy A, Siegelbaum  
590 SA. 2016. Gating of hippocampal activity, plasticity, and memory by entorhinal  
591 cortex long-range inhibition. *Science* **351**:aaa5694. doi:10.1126/science.aaa5694
- 592 Bittner KC, Grienberger C, Vaidya SP, Milstein AD, Macklin JJ, Suh J, Tonegawa S,  
593 Magee JC. 2015. Conjunctive input processing drives feature selectivity in  
594 hippocampal CA1 neurons. *Nat Neurosci* **18**:1133–1142. doi:10.1038/nn.4062
- 595 Buzsáki G. 2015. Hippocampal sharp wave-ripple: A cognitive biomarker for episodic  
596 memory and planning. *Hippocampus* **25**:1073–188. doi:10.1002/hipo.22488
- 597 Buzsáki G, Anastassiou CA, Koch C. 2012. The origin of extracellular fields and  
598 currents-EEG, ECoG, LFP and spikes. *Nat Rev Neurosci*. doi:10.1038/nrn3241
- 599 Buzsáki G, Draguhn A. 2004. Neuronal oscillations in cortical networks. *Science (80- )*  
600 **304**:1926–1929. doi:10.1126/SCIENCE.1099745
- 601 Buzsáki G, Schomburg EW. 2015. What does gamma coherence tell us about inter-  
602 regional neural communication? *Nat Neurosci* **18**:484–489. doi:10.1038/NN.3952
- 603 Cohen MX. 2017. Where Does EEG Come From and What Does It Mean? *Trends*  
604 *Neurosci* **40**:208–218. doi:10.1016/J.TINS.2017.02.004
- 605 de la Prida LM. 2020. Potential factors influencing replay across CA1 during sharp-  
606 wave ripples. *Philos Trans R Soc B Biol Sci*. doi:10.1098/rstb.2019.0236
- 607 de la Prida LM, Huberfeld G, Cohen I, Miles R, Menendez De La Prida L, Huberfeld G,  
608 Cohen I, Miles R. 2006. Threshold behavior in the initiation of hippocampal  
609 population bursts. *Neuron* **49**:131–142. doi:10.1016/j.neuron.2005.10.034
- 610 Diba K, Buzsáki G. 2007. Forward and reverse hippocampal place-cell sequences  
611 during ripples. *Nat Neurosci* **10**:1241–2. doi:10.1038/nn1961
- 612 Dutta S, Ackermann E, Kemere C. 2019. Analysis of an open source, closed-loop,  
613 realtime system for hippocampal sharp-wave ripple disruption. *J Neural Eng* **16**.  
614 doi:10.1088/1741-2552/aae90e
- 615 Fernández-Ruiz A, Oliva A, de Oliveira EF, Rocha-Almeida F, Tingley D, Buzsáki G.



- 616 2019. Long-duration hippocampal sharp wave ripples improve memory. *Science*  
617 (80-) **364**:1082–1086. doi:10.1126/science.aax0758
- 618 Foster DJ. 2017. Replay Comes of Age. *Annu Rev Neurosci* **40**:581–602.  
619 doi:10.1146/annurev-neuro-072116-031538
- 620 Frey M, Tanni S, Perrodin C, O'leary A, Nau M, Kelly J, Banino A, Bendor D, Lefort J,  
621 Doeller CF, Barry C. 2021. Interpreting wide-band neural activity using  
622 convolutional neural networks. *Elife* **10**. doi:10.7554/ELIFE.66551
- 623 Friston KJ, Bastos AM, Pinotsis D, Litvak V. 2015. LFP and oscillations-what do they  
624 tell us? *Curr Opin Neurobiol*. doi:10.1016/j.conb.2014.05.004
- 625 G F, A E, T G, N P, K L, M D, D VR, CE E. 1999. Real-time tracking of memory  
626 formation in the human rhinal cortex and hippocampus. *Science* **285**:1582–1585.  
627 doi:10.1126/SCIENCE.285.5433.1582
- 628 Girardeau G, Benchenane K, Wiener SI, Buzsáki G, Zugaro MB. 2009. Selective  
629 suppression of hippocampal ripples impairs spatial memory. *Nat Neurosci*  
630 **12**:1222–1223. doi:10.1038/nn.2384
- 631 Gridchyn I, Schoenenberger P, O'Neill J, Csicsvari J. 2020. Assembly-Specific  
632 Disruption of Hippocampal Replay Leads to Selective Memory Deficit. *Neuron*  
633 **106**:291-300.e6. doi:10.1016/J.NEURON.2020.01.021
- 634 Grosmark AD, Buzsáki G. 2016. Diversity in neural firing dynamics supports both rigid  
635 and learned hippocampal sequences. *Science* **351**:1440–3.  
636 doi:10.1126/science.aad1935
- 637 Hagen E, Chambers AR, Einevoll GT, Pettersen KH, Enger R, Stasik AJ. 2021.  
638 RippleNet: a Recurrent Neural Network for Sharp Wave Ripple (SPW-R)  
639 Detection. *Neuroinformatics* **19**. doi:10.1007/s12021-020-09496-2
- 640 Jadhav S, Kemere C, German P, Frank L. 2012. Awake hippocampal sharp-wave  
641 ripples support spatial memory. *Science* **336**:1454–1458.  
642 doi:10.1126/SCIENCE.1217230
- 643 Joo Hannah R, Frank LM. 2018. The hippocampal sharp wave-ripple in memory  
644 retrieval for immediate use and consolidation. *Nat Rev Neurosci* **19**:744–757.  
645 doi:10.1038/s41583-018-0077-1
- 646 Joo Hannah R., Frank LM. 2018. The hippocampal sharp wave-ripple in memory  
647 retrieval for immediate use and consolidation. *Nat Rev Neurosci*.  
648 doi:10.1038/s41583-018-0077-1
- 649 Jun JJ, Steinmetz NA, Siegle JH, Denman DJ, Bauza M, Barbarits B, Lee AK,  
650 Anastassiou CA, Andrei A, Aydin Ç, Barbic M, Blanche TJ, Bonin V, Couto J,  
651 Dutta B, Gratiy SL, Gutnisky DA, Häusser M, Karsh B, Ledochowitsch P, Lopez  
652 CM, Mitelut C, Musa S, Okun M, Pachitariu M, Putzeys J, Rich PD, Rossant C,  
653 Sun WL, Svoboda K, Carandini M, Harris KD, Koch C, O'Keefe J, Harris TD.  
654 2017. Fully integrated silicon probes for high-density recording of neural activity.  
655 *Nature* **551**:232–236. doi:10.1038/nature24636
- 656 Kamondi A, Acsády L, Buzsáki G. 1998. Dendritic spikes are enhanced by cooperative  
657 network activity in the intact hippocampus. *J Neurosci* **18**:3919–3928.  
658 doi:10.1523/JNEUROSCI.18-10-03919.1998
- 659 Kitamura T, Macdonald CJ, Tonegawa S. 2015. Entorhinal-hippocampal neuronal  
660 circuits bridge temporally discontinuous events. *Learn Mem* **22**:438–43.  
661 doi:10.1101/lm.038687.115

- 662 Klausberger T, Marton LF, O'Neill J, Huck JHJ, Dalezios Y, Fuentealba P, Suen WY,  
663 Papp E, Kaneko T, Watanabe M, Csicsvari J, Somogyi P. 2005. Complementary  
664 roles of cholecystikinin- and parvalbumin-expressing GABAergic neurons in  
665 hippocampal network oscillations. *J Neurosci* **25**:9782–9793.  
666 doi:10.1523/JNEUROSCI.3269-05.2005
- 667 Klausberger T, Somogyi P. 2008. Neuronal diversity and temporal dynamics: the unity  
668 of hippocampal circuit operations. *Science* **321**:53–7.  
669 doi:10.1126/science.1149381
- 670 Mahendran A, Vedaldi A. 2014. Understanding Deep Image Representations by  
671 Inverting Them. *Proc IEEE Comput Soc Conf Comput Vis Pattern Recognit* **07-12-**  
672 **June**:5188–5196.
- 673 Mizuseki K, Diba K, Pastalkova E, Buzsáki G. 2011. Hippocampal CA1 pyramidal cells  
674 form functionally distinct sublayers. *Nat Neurosci* **14**:1174–81.  
675 doi:10.1038/nn.2894
- 676 Modi ME, Sahin M. 2017. Translational use of event-related potentials to assess circuit  
677 integrity in ASD. *Nat Rev Neurol*. doi:10.1038/nrneurol.2017.15
- 678 Nakashiba T, Buhl DL, McHugh TJ, Tonegawa S. 2009. Hippocampal CA3 Output Is  
679 Crucial for Ripple-Associated Reactivation and Consolidation of Memory. *Neuron*  
680 **62**:781–787. doi:10.1016/J.NEURON.2009.05.013
- 681 Navas-Olive A, Valero M, de Salas A, Jurado-Parras T, Averkin RG, Gambino G, Cid  
682 E, de la Prida LM. 2020. Multimodal determinants of phase-locked dynamics  
683 across deep-superficial hippocampal sublayers during theta oscillations. *Nat*  
684 *Commun* **11**:2217.
- 685 Niedermeyer E, Lopes da Silva F. 2005. Electroencephalography: Basic Principles,  
686 Clinical Applications, And Related Fields, 5th ed. Wolters Kluwer.
- 687 Ólafsdóttir HF, Bush D, Barry C. 2018. The Role of Hippocampal Replay in Memory  
688 and Planning. *Curr Biol* **28**:R37–R50. doi:10.1016/j.cub.2017.10.073
- 689 Oliva A, Fernández-Ruiz A, Buzsáki G, Berényi A. 2016. Role of Hippocampal CA2  
690 Region in Triggering Sharp-Wave Ripples. *Neuron* **91**:1342–1355.  
691 doi:10.1016/j.neuron.2016.08.008
- 692 Oliva A, Fernández-Ruiz A, Fermino de Oliveira E, Buzsáki G. 2018. Origin of Gamma  
693 Frequency Power during Hippocampal Sharp-Wave Ripples. *Cell Rep* **25**:1693-  
694 1700.e4. doi:10.1016/j.celrep.2018.10.066
- 695 Oliva A, Fernández-Ruiz A, Leroy F, Siegelbaum SA. 2020. Hippocampal CA2 sharp-  
696 wave ripples reactivate and promote social memory. *Nature* **587**:264–269.  
697 doi:10.1038/S41586-020-2758-Y
- 698 Patel J, Schomburg EW, Berényi A, Fujisawa S, Buzsáki G. 2013. Local generation  
699 and propagation of ripples along the septotemporal axis of the hippocampus. *J*  
700 *Neurosci* **33**:17029–41. doi:10.1523/JNEUROSCI.2036-13.2013
- 701 Pfeiffer BE. 2017. The content of hippocampal “replay”. *Hippocampus*.  
702 doi:10.1002/hipo.22824
- 703 Pfeiffer BE, Foster DJ. 2015. Autoassociative dynamics in the generation of sequences  
704 of hippocampal place cells. *Science (80- )* **349**:180–183.  
705 doi:10.1126/science.aaa9633
- 706 Ramirez-Villegas JF, Logothetis NK, Besserve M. 2015. Diversity of sharp-wave-ripple  
707 LFP signatures reveals differentiated brain-wide dynamical events. *Proc Natl Acad*

708        *Sci U S A* **112**:E6379-87. doi:10.1073/pnas.1518257112

709        Redmon J, Divvala S, Girshick R, Farhadi A. 2015. You Only Look Once: Unified, Real-  
710        Time Object Detection. *Proc IEEE Comput Soc Conf Comput Vis Pattern Recognit*  
711        **2016-Decem**:779–788.

712        Richards B, Lillicrap T, Beaudoin P, Bengio Y, Bogacz R, Christensen A, Clopath C,  
713        Costa R, de Berker A, Ganguli S, Gillon C, Hafner D, Kepecs A, Kriegeskorte N,  
714        Latham P, Lindsay G, Miller K, Naud R, Pack C, Poirazi P, Roelfsema P,  
715        Sacramento J, Saxe A, Scellier B, Schapiro A, Senn W, Wayne G, Yamins D,  
716        Zenke F, Zylberberg J, Therien D, Kording K. 2019. A deep learning framework for  
717        neuroscience. *Nat Neurosci* **22**:1761–1770. doi:10.1038/S41593-019-0520-2

718        Roumis DK, Frank LM. 2015. Hippocampal sharp-wave ripples in waking and sleeping  
719        states. *Curr Opin Neurobiol* **35**:6–12. doi:10.1016/J.CONB.2015.05.001

720        Shamash P, Carandini M, Harris K, Steinmetz N. 2018. A tool for analyzing electrode  
721        tracks from slice histology. *bioRxiv* 447995. doi:10.1101/447995

722        Siegle JH, López AC, Patel YA, Abramov K, Ohayon S, Voigts J. 2017. Open Ephys:  
723        An open-source, plugin-based platform for multichannel electrophysiology. *J*  
724        *Neural Eng* **14**. doi:10.1088/1741-2552/aa5eea

725        Simonyan K, Vedaldi A, Zisserman A. 2013. Deep Inside Convolutional Networks:  
726        Visualising Image Classification Models and Saliency Maps. *2nd Int Conf Learn*  
727        *Represent ICLR 2014 - Work Track Proc*.

728        Sosa M, Joo HR, Frank LM. 2020. Dorsal and Ventral Hippocampal Sharp-Wave  
729        Ripples Activate Distinct Nucleus Accumbens Networks. *Neuron* **105**:725-741.e8.  
730        doi:10.1016/J.NEURON.2019.11.022

731        Stark E, Roux L, Eichler R, Buzsáki G. 2015. Local generation of multineuronal spike  
732        sequences in the hippocampal CA1 region. *Proc Natl Acad Sci U S A* **112**:10521–  
733        6. doi:10.1073/pnas.1508785112

734        Stark E, Roux L, Eichler R, Senzai Y, Royer S, Buzsáki G. 2014. Pyramidal cell-  
735        interneuron interactions underlie hippocampal ripple oscillations. *Neuron* **83**:467–  
736        480. doi:10.1016/j.neuron.2014.06.023

737        Sullivan D, Csicsvari J, Mizuseki K, Montgomery S, Diba K, Buzsáki G. 2011.  
738        Relationships between hippocampal sharp waves, ripples, and fast gamma  
739        oscillation: influence of dentate and entorhinal cortical activity. *J Neurosci*  
740        **31**:8605–8616. doi:10.1523/JNEUROSCI.0294-11.2011

741        Valero M, Cid E, Averkin RG, Aguilar J, Sanchez-Aguilera A, Viney TJ, Gomez-  
742        Dominguez D, Bellistri E, de la Prida LM. 2015. Determinants of different deep  
743        and superficial CA1 pyramidal cell dynamics during sharp-wave ripples. *Nat*  
744        *Neurosci* **18**:1281–1290. doi:10.1038/nn.4074

745        van de Ven GM, Trouche S, McNamara CG, Allen K, Dupret D. 2016. Hippocampal  
746        Offline Reactivation Consolidates Recently Formed Cell Assembly Patterns during  
747        Sharp Wave-Ripples. *Neuron* **92**:968–974. doi:10.1016/j.neuron.2016.10.020

748        Yamamoto J, Tonegawa S. 2017. Direct Medial Entorhinal Cortex Input to  
749        Hippocampal CA1 Is Crucial for Extended Quiet Awake Replay. *Neuron* **96**:217-  
750        227.e4. doi:10.1016/j.neuron.2017.09.017

751

752

## Material and Methods

### Animals

All protocols and procedures were performed according to the Spanish legislation (R.D. 1201/2005 and L.32/2007) and the European Communities Council Directive 2003 (2003/65/CE). Experiments were approved by the Ethics Committee of the Instituto Cajal and the Spanish Research Council.

In this work, we used different mouse lines aimed to target different cell-type specific populations for optogenetic and imaging experiments. Experiments included in this paper follow the principle of reduction, to minimize the number of animals used and this is the reason why we obtained data from different mouse lines. Animals and sessions used are summarized in Supplementary Table 1. Animals were maintained in a 12 h light–dark cycle (7 a.m. to 7 p.m.) with access to food and drink *ad libitum*.

### Head-fixed preparation

Animals were implanted with fixation bars under isoflurane (1.5–2%; 30% oxygen) anesthesia. Bars and ground/reference screws (over the cerebellum) were fixed with light-curing acrylic resins (OptiBond and UNIFAST LC). After surgery, mice were treated with buprenorphine during 2 days. For optogenetic experiments, mice from different promotor-specific Cre lines were previously injected with AAV5-DIO-EF1a-hChR2-EYFP (1  $\mu$ L; titer  $4.5 \times 10^{12}$  vg/ml; provided by UNC Vector core, Deisseroth lab) targeting the dorsal CA1 region (–1.9 mm AP; 1.25 mm ML and 1 mm depth). Transgenic Thy1-ChR2-YFP mice were directly implanted with fixation bars.

Two days after surgery, mice were habituated to head-fixed conditions (10–14 days of training). The apparatus consisted on a wheel (40 cm diameter) hosting different somatosensory cues and equipped with a Hall sensor (HAMLIN 55300; Littelfuse Inc) to track for position analogically. Animals were water rewarded just after each training session (2–4 sessions  $\times$  day). After several days, mice were able to stay comfortable in the apparatus with periods of running, grooming and immobility.

Once habituated, mice were anesthetized with isoflurane and a craniotomy was practiced for electrophysiological recordings (antero-posterior: –3.9 to –6 mm from Bregma; medio-lateral: 2–5 mm). The craniotomy was sealed with Kwik-Cast silicone elastomer and mice returned to their home cage. Recording sessions started the day after craniotomy.

### Electrophysiological recordings

LFP recordings were obtained with integrated  $\mu$ LED optoelectrodes (32 channels, 4 shanks of 8-channels and 3  $\mu$ LED each) originally provided by Euisik Yoon under the NSF-funded NeuroNex project and later purchased from NeuroLight Technologies, LLC, N1-A0-036/18 and Plexon. Wideband (1 Hz–5 KHz) LFP signals were recorded at 30 KHz sampling rate with an RHD2000 Intan USB Board running under Open Ephys. Optoelectrode recordings targeted the dorsal CA1 region, using characteristic features such as the laminar profile of theta and sharp-wave ripples, as well as unit activity to infer position within the hippocampus.

Ultra-dense recordings were obtained with Neuropixels 1.0 probes and acquired with the PXIe acquisition module mounted in the PXI-Express chassis (National Instruments). Neuropixels probes consist of up to 966 recording sites (70  $\times$  20  $\mu$ m) organized in a checkerboard pattern, from which 384 can be selected for recording. Recordings were made in external reference mode with LFP gain set at 250 and at 2500 Hz sampling rate, using the SpikeGLX software. Only LFP channels were used for analysis. The probe targeted the dorsal-to-ventral hippocampus at different anterior-



to-posterior positions in 4 different mice (Sup.Table.1). To recover the penetrating track precisely, the back of the Neuropixels probe was coated with Dil (Invitrogen).

After completing experiments, mice were perfused with 4% paraformaldehyde and 15% saturated picric acid in 0.1 M (pH 7.4) phosphate-buffered saline (PBS). Brains were post-fixed overnight, washed in PBS, and serially cut in 70  $\mu$ m coronal sections (Leica VT 1000S vibratome). Sections containing the Neuropixels probe tracks were identified with a stereomicroscope (S8APO, Leica) and mounted on glass slides in Mowiol (17% polyvinyl alcohol 4–88, 33% glycerin and 2% thimerosal in PBS).

Sections from Neuropixels recording were analyzed with SHARP-Track, a tool to localize regions going through electrode tracks (Shamash et al., 2018) ([https://github.com/petersaj/AP\\_histology](https://github.com/petersaj/AP_histology)). Acronyms in Fig.5A correspond to the following: Corpus Callosum (cc); Primary Visual Cortex (V1); Stratum Oriens (SO); Stratum Piramidale (SP); Stratum Radiatum (SR); Stratum Lacunosum Moleculare (SLM); Molecular Layer Dentate Gyrus (ML); Granular Layer Dentate Gyrus (GCL); Hilus (HIL); Hippocampal Fissure (fiss); Basolateral Amygdala (BLA); Amygdalopiriform transition area (APir); Lateral Posterior Medial Rostral Thalamus (LPMR); Posterior Thalamus (Po); Vento Posterior Medial Thalamus (VPM); Vento Posterior Lateral Thalamus (VPL); Lemniscus (Lemn); Vento Medial Thalamus (VM); Zona Incerta, Dorsal Part (ZID); Zona Incerta, Ventral Part (ZIV).

### Neural Network specifications

We used Python 3.7.9 with libraries Numpy 1.18.5, Scipy 1.5.4, Pandas 1.1.4 and H5Py 2.10.0 for programming different routines. To build, train and test the network, we use the Tensorflow 2.3.1 library, with its built-in Keras 2.4.0 application programming interface (API). Training and offline validation of the CNN was performed over the Artemisa high performance computing infrastructure (<https://artemisa.ific.uv.es/web/content/nvidia-tesla-volta-v100-sxm2>). It consisted in 23 machines equipped with 4 NVIDIA Volta V100 GPUs. Analyses were conducted on personal computers (Intel Xeon E3 v5 processor with 64GB RAM and Ubuntu v.20.04).

The CNN architecture was designed as a sequence of blocks integrated by one 1D-Convolutional Layer (Cun et al., 1990) followed by one Batch Normalization Layer (Ioffe and Szegedy, 2015) and one Leaky ReLU Activation Layer (Maas et al., 2013). There were 7 of these blocks (21 layers) and a final Dense Layer (Rosenblatt, 1958) (layer 22) (Fig.1C).

One-dimensional Convolutional layers (tf.keras.layers.Conv1D) were in charge of processing data and looking for characteristic features. These layers have a determined number of kernels, which was determined in the parameter search. A kernel is a matrix of weights acting to apply a convolution operation over data. The result of this operation is known as the kernel activation signal. A Convolutional layer generates as many kernel activations as the number of kernels it has. Batch Normalization layers (tf.keras.layers.BatchNormalization) perform a normalization of the Convolutional layer kernel activations, fixing its means and variances and providing stability and robustness to the whole network. Leaky ReLU layer (tf.keras.layers.LeakyReLU) has a similar purpose to the BatchNorm layer, making the network more stable by transforming negative input values into numbers very close to 0. The final Dense layer (tf.keras.layers.Dense) was fit to the dimension of the output space (i.e. probability values).

Batch Normalization layers parameters were all left as their default values defined in the Tensorflow 2.3.1 library. The Leaky ReLU layer alpha parameter was set to 0.1. For Convolutional layers, the kernel size and stride were set to the same value so that the

network operates similarly offline an online. The kernel size and stride determined the duration of the input window, so they were tuned in order to fit either a 32ms window (CNN32) or a 12.8ms window (CNN12). Values of kernel size and stride for Convolutional layers 1, 4, 7, 10, 13, 16 and 19 of CNN32 were: 5, 1, 2, 1, 2, 1, 2, respectively. For CNN12, the values were 2, 1, 2, 1, 2, 1 and 2. Since max-pooling layers can be replaced by Convolutional layers with increased stride, we chose not using max-pooling layers to avoid issues with the input window size (Springenberg et al., 2014).

The number of kernels and kernel regularizers were selected after performing an initial parametric search (initial learning rate, number of kernels factor and batch size; Fig.S1A). For the Dense layer we used a sigmoid activation function operating over 1 unit to produce 1 channel output. All the other parameters for the Convolutional layers, as well as for the Dense layer, were set initially at default values. Additionally, we also tested whether adding two LSTM layers before the final Dense layer improved performance in the preliminary parameter tests.

We selected our CNN32 as that with the lower and more stable training evolution (see below) from the 10-best networks in the initial parameter search (out of 107; Fig S1B). CNN32+LSTM networks exhibited similar performance, but took substantially more time for training. A more thorough parametric search was conducted over a larger set of parameters (initial learning rate, number of kernels factor, batch size, optimizer, optimizer epsilon, regularizer, regularizer value and decay; Fig.S1C) for both types of architectures. The initially selected CNN32 was amongst the 30-best networks of the extended parameter search, also exhibiting fast training and high loss evolution stability (out of 781). Based on parametric searches, we chose the Adam algorithm as the optimizer (Kingma and Ba, 2015) with an initial learning rate of 0.001,  $\beta_1 = 0.9$ ,  $\beta_2 = 0.999$  and  $\epsilon = 1e-07$ . Batch size was set at 16 and the number of kernels for Convolutional layers 1, 4, 7, 10, 13, 16 and 19 was set at 4, 2, 8, 4, 16, 8 and 32, respectively. A L2 regularization method (Tikhonov and Arsenin, 1977) with a 0.0005 value was employed to avoid overfitting. No additional learning rate decay was used.

### Ground truth and data annotation

A MATLAB R2019b tool was designed to annotate and validate data by an expert electrophysiologist (original expert). All data was visually inspected and SWR events annotated. An important decision we made was to manually annotate the start and the end of SWR events so that the network could learn anticipating events in advance. The start of the event was defined at the first ripple or the sharp-wave onset. The end of the event was defined at the latest ripple or when sharp-wave resumed. While there was some level of ambiguity on these definitions, we opted for including these marks in order to facilitate transition to ground truth detection. An additional expert (new expert) tagged SWR independently using a subset of sessions, to allow for comparisons between experts in the same lab.

### Data preparation

Datasets used for training and development of the CNN were created by loading a number of experimental sessions and storing them in two different 3-dimensional matrices,  $Y$  and  $\tilde{Y}$ .

Matrix  $X$  stored several chunks of 8-channels LFP recordings. From each session, LFP data from all probe shanks displaying any SWR were loaded, unless specific shanks were selected. If a shank had more than 8 channels, then they were randomly selected while giving priority to those located at the stratum pyramidale of CA1. All LFP signals were down-sampled to 1250 Hz and normalized using z-score. LFP signals were sliced into chunks of 57.6 seconds, which is exactly divisible by 0.032s and 0.0128s, in order

to keep a consistent matrix shape even when various sessions of different durations were used. This chunk size maintains the properties of long duration signals, which is essential for the CNN to reach a high performance score when fed with continuous data. Chunks with no SWR events would be discarded, but that was an extremely rare case. At the end of this process the result is a matrix X with dimension (n, 72000, 8), where n is the number of chunks of 72000 samples (57.6 seconds sampled at 1250 Hz) for each of the 8 LFP channels.

Matrix Y contained the annotated labels for each temporal window (32 or 12.8 ms) stored in X.

To create Y, each chunk was separated in windows of 32 or 12.8 ms and then assigned a label, a number between 0 and 1, depending on the percentage of the window occupied by a SWR event. Therefore, dimension of matrix Y was (n, 1800, 1) for CNN32, since there are 1800 32ms windows in a chunk of 57.6s, and (n, 4500, 1) for CNN12, with 4500 windows of size 12.8ms for each chunk.

Finally, the whole dataset (both X and Y matrices) was separated into the training set, used to fit the model, and the development set, used to evaluate the performance of the trained model with different data than those used for training while still tuning the network hyper-parameters. Train set took 70% of the data and development set the remaining 30%.

### **CNN training, development and testing**

Two sessions from 2 different mice were used as the training set (Sup.Table1). Training was run for 3000 epochs using the Binary Cross-Entropy as loss function:

$$H_p(q) = -\frac{1}{N} \sum_{i=1}^N y_i \cdot \log(p(y_i)) + (1 - y_i) \cdot \log(1 - p(y_i))$$

where N is the number of windows,  $y_i$  is the label of window  $i$ , and  $p(y_i)$  is the probability predicted for window  $i$ .

In order to evaluate the network performance, two different datasets were used: the training set described above, and the validation set, consisting of 15 sessions from 5 different animals that were not used for training or development (Sup.Table.1).

To detect SWR event, we set a probability threshold to identify windows with positive and negative predictions. Accordingly, predictions were classified in four categories: True Positive (TP) when the prediction was positive and the ground truth window did contain a SWR event; False Positive (FP) when the prediction was positive in a window that did not contain any SWR; False Negative (FN) when the prediction is negative but the window contained a SWR; and True Negative (TN) when the prediction was negative and the window did not contain any SWR event.

Intersection over Union (IOU) methodology was employed to classify predictions into those four categories. It was calculated by dividing the intersection (overlapping) of two windows by the union of them:

$$IoU = \frac{window_1 \cap window_2}{window_1 \cup window_2}$$

Two windows were considered to match if their IOU was equal or greater than 0.1. If a positive prediction had a match with any window containing a ripple it was considered a TP, or it was classified as FP otherwise. All true events that did not have any matching positive prediction were considered FN. Negative predictions with no matching true events windows were TN.

With predicted and true events classified into those four categories there are three measures that can be used to evaluate the performance of the model. Precision (P), which was computed as the total number of TPs divided by TPs and FPs, represents the percentage of predictions that were correct.

$$Precision = \frac{TP}{TP + FP}$$

Recall (R), which was calculated as TPs divided by TPs and FNs, represents the percentage of true events that were correctly predicted.

$$Recall = \frac{TP}{TP + FN}$$

Finally, the F1 score, calculated as the harmonic mean of Precision and Recall, represents the network performance.

$$F1 = \frac{2 * (Precision * Recall)}{Precision + Recall}$$

As mentioned before, a prediction was considered positive when its probability surpassed a specified threshold. During offline validation, when a prediction was positive, a second lower threshold was also used to determine the boundaries of the event more precisely. In order to select the best thresholds for offline validation, all combinations were compared and the one that yielded the best F1 score was chosen. Possible values for the first threshold were 0.80, 0.75, 0.70, 0.65, 0.60, 0.55, 0.50, 0.45, 0.40, 0.35, 0.30, 0.25, 0.20, 0.15 and 0.10, while for the second threshold were 0.80, 0.70, 0.60, 0.50, 0.40, 0.30, 0.20 and 0.10. For online validation only the first threshold can be used and it was adjusted manually at the beginning of the experiment based on the expert criteria.

To estimate delay between prediction and SWR events, the temporal relation between correct predictions and their matching true events was measured. SWR ripple peaks were defined after filtering the relevant LFP channel using a third-order Butterworth bandpass filter between 70 and 250 Hz. The resulting signal was subsequently filtered with a four-order Savitzky-Golay filter and smoothed twice with windows of 3 and 6.5 ms to obtain the SWR envelope. The maximal value of the envelope signal was defined as the SWR ripple peak. The interval between the initial prediction time and the SWR ripple peak was defined as the time to peak.

The trained model is accessible at the Github repository: <https://github.com/RoyVII/cnn-ripple>. Code visualization and detection is shown in an interactive notebook <https://colab.research.google.com/github/RoyVII/cnn-ripple/blob/main/src/notebooks/cnn-example.ipynb>

### Offline detection of SWR events with Butter filters

Standard ripple detection tools are based on spectral filters. In order to compare online and offline performance, we adopted the Open Ephys bandpass (100-300 Hz passband) second-order Butterworth filter as the gold standard. Offline filter detection was computed in MATLAB R2019b, using the *butter* filter (100-300 Hz passband) and a non-casual filter *filtfilt* to avoid phase lags. In order to compute the envelope, the filtered signal was amplified twice, filtered by a fourth-order Savitzky-Golay filter, and then smoothed by two consecutive *movmean* sliding windows (2.3 and 6.7 ms). A



detection had to fulfill two conditions: the envelope had to surpass a first threshold, which will define the ripple beginning and end, and a second threshold to be considered a detection. Detections closer than 15ms were merged. Performance of ripple-detection methods is very sensitive to the chosen threshold. To look for the fairest comparison, we made predictions for all possible combinations of the first threshold being 1, 1.5, 2, 2.5 times the envelope standard deviation, and the second threshold being 3, 3.5, 4, 4.5, 5, 5.5, 6, 6.5, 7, 7.5, 8, 8.5, 9, 9.5, 10 times the envelope standard deviation (giving a total of 60 threshold combinations). We then chose the one that scored the maximum F1. This was done separately for each session.

Online detections were defined whenever the filtered signal was above a single threshold (see next section). To exclude for artifacts and to cope with detection standards (Fernández-Ruiz et al., 2019), an additional non-ripple channel was used to veto high-frequency noise detections.

### Open Ephys custom plugins for online detection

Two custom plugins were developed using Open Ephys GUI 0.4.6 software in a personal computer. The first plugin was designed to detect when a signal crossed a determined amplitude threshold, defined as the signal standard deviation multiplied by some number. It was used in combination with the Bandpass Filter plugin, which implements a Butterworth filter, so the input for the crossing detector was a filtered signal. In order to avoid artifacts, we use a second input channel from a separate region defined by the experimenter. Events detected in both channels were discarded.

The second plugin was developed to operate the CNN and it used the Tensorflow 2.3.0 API for C ([https://www.tensorflow.org/install/lang\\_c](https://www.tensorflow.org/install/lang_c)). Since the network was trained to work with data sampled at 1250 Hz, the plugin down-sampled the input channels. It also separated data into windows of 12.8 ms and 8-channels to feed into the CNN every 6.4 ms. Detection threshold was defined as a probability between 0 and 1, and it was manually adjusted by the experimenter.

Both plugins normalized the input data using z-score normalization. They required a short calibration time (about one minute) to calculate the mean and standard deviation of the signals. The user could establish the detection threshold for both of them and when an event was found they would send a signal through a selected output channel. Simulated Open Ephys experiments used the same setup but the data was read from a file instead of streamed directly from the experiment. Detection plugin:

<https://github.com/RoyVII/CNNRippleDetectorOEPlugin>

### Closed-loop optogenetic experiments

For closed-loop experiments, the output channel from the Open Ephys plugging was fed into an Arduino board (Nano ATmega328) using an USB 3.0 connection. Optogenetic stimulation was performed with integrated  $\mu$ LED optoelectrodes using the OSC1Lite driver from NeuroLight Technologies controlled by the Arduino. Microwatt blue light stimulation at 10–20 microW was used to activate cell-type specific ChR2. Specificity of viral expression and localization of probe tracks were histologically assessed after experiments.

### Computing the kernel saliency maps

During training, kernels weights are updated so each of them specializes in detecting a particular feature of SWR input data. In order to interpret these features, we adapted a methodology used in 2-dimensional CNNs for image processing (Simonyan et al., 2013). First, we created an input 8x40 LFP signal with random values (standard normal distribution, with zero mean and 0.01 standard deviation). Then, for each kernel we updated this input signal applying a stochastic gradient descent optimizer (tf.keras.optimizers.SGD) with a learning rate of 0.1, momentum 0.1, and a loss

function equal to minus the normalized kernel activation that produced such input (therefore making it gradient ascent). We repeated this optimization process until the mean squared error between the previous input and the optimized input was less than  $10^{-9}$ , or after 2000 iterations, whatever came first. The resulting input signal would be one that the chosen kernel is maximally responsive to. Code example for this process applied to the ResNet50V2 model of the ImageNet dataset (<https://www.image-net.org/>) can be found at the Keras documentation: [https://keras.io/examples/vision/visualizing\\_what\\_convnets\\_learn/](https://keras.io/examples/vision/visualizing_what_convnets_learn/)

### Uniform Manifold Approximation and Projection (UMAP)

UMAP is a dimension reduction technique commonly used for visualization of multi-dimensional data in a 2- or 3-dimensional embedding (McInnes et al., 2018). The embedding is found by searching a low dimensional projection with the closest equivalent fuzzy topological structure to that of the hyper-dimensional input data. We run UMAP version 0.5.1 (<https://umap-learn.readthedocs.io/en/latest/>) in Python 3.7 Anaconda.

We applied UMAP to decode CNN operation using the network feature maps in response to a diversity of LFP inputs. Feature maps were built by concatenating the resulting kernel activation from all the Convolutional layers resulting in a 1329-dimensional vector. The goal was to compute the reduced 2-dimensional UMAP embedding from a large number of LFP events.

First, we computed the UMAP embedding of the feature map of the CNN using 7491 SWR events and 7491 Random events and projected them in a color scale reflecting the different labels. Next, we used UMAP to account for the evolution of segregation between SWR and Random events in 20 log-distribution periods along CNN training epochs. To this purpose, we compute the embedding of the last epoch and fit the others epochs' feature maps to it, in order to make distances comparable. To quantify segregation, we estimated the Euclidean distance between the centroids of SWR and random clouds. 2D-UMAP embeddings were evaluated for different parameter combinations of the number of neighbors and the minimal distance. After noticing no major differences, we choose their default values.

### Pattern matching

Pattern matching between saliency maps from the different kernels and the LFP windows was computed using *matchTemplate* from CV2 package (version 4.5.1), OpenCV library for python, with the *TM\_CCORR* template matching operation. It slides a template (saliency map) along the whole signal (LFP window) and outputs a measure on their similarity for each slide. LFP windows provided were 100ms 8-channel (8x125) z-scored windows around all true positive events, same number of true negative events and all true positive and false positive events for both the training and validations sets. Windows were centered on the LFP minimum of the pyramidal channel closest to the maximum of the SWR envelope within a 10ms window (envelope computed as described above).

### Simulated penetrations along Neuropixels probe

Simulated penetrations were obtained choosing Neuropixel electrodes with a relative distance similar to the  $\mu$ LED optoelectrode probe. To this purpose, we chose Neuropixel external electrodes (64 $\mu$ m horizontal separation vs 70 $\mu$ m for the  $\mu$ LED probe), alternating left and right for each row, so the vertical distance was 20 $\mu$ m (same as in  $\mu$ LED probes). Therefore, a simulated penetration always consisted of eight neighboring electrodes (e.g. [1 4 5 8 9 12 13 16]). To evaluate changes across layers and regions, the simulated penetration was moved all along the Neuropixels probe in 93 steps (downward/upward) thus providing a continuous mapping of LFP signals. For

example, the following penetration sequence spanned along the brain: [1 4 5 8 9 12 13 16], [5 8 9 12 13 16 17 20], [9 12 13 16 17 20 21 24] and so on.

For CSD analysis we proceeded similarly, but choosing LFP channels every 100  $\mu\text{m}$  to mimic a 16-channel silicon probe. CSD signals were calculated from the second spatial derivative. Smoothing was applied to CSD signals for visualization purposes only. Tissue conductivity was considered isotropic across layers.

### Quantification and statistical analysis

Statistical analysis was performed with Python 3.8.5 and/or MATLAB R2019b. No statistical method was used to predetermine sample sizes, which were similar to those reported elsewhere. Normality and homoscedasticity were confirmed with the Kolmogorov-Smirnov and Levene's tests, respectively. The number of replications is detailed in the text and figures.

Several ways ANOVAs were applied for group analysis. Post hoc comparisons were evaluated with the Tukey-Kramer test and whenever required Bonferroni correction was applied. For paired comparisons the Student t-test was used. Correlation between variables was evaluated with the Pearson product-moment correlation coefficient, which was tested against 0 (i.e., no correlation was the null hypothesis) at  $p < 0.05$  (two sided). In most cases values were z-scored (value – mean divided by the SD) to make data comparable between animals or across layers.

### Data and code availability

Data is deposited in the Figshare repository <https://figshare.com/projects/cnn-ripple-data/117897>. The code and trained model is accessible at the Github repository: <https://github.com/RoyVII/cnn-ripple>. Code visualization and detection is shown in an interactive notebook <https://colab.research.google.com/github/RoyVII/cnn-ripple/blob/main/src/notebooks/cnn-example.ipynb>. The online detection Open Ephys plugin is accessible at the Github repository: <https://github.com/RoyVII/CNNRippleDetectorOEPlugin>

### References for Methods

- Cun, L., Boser, B., Denker, J.S., Henderson, D., Howard, R.E., Hubbard, W., and Jackel, L.D. (1990). Handwritten Digit Recognition with a Back-Propagation Network. *Adv. Neural Inf. Process. Syst.* 2, 396--404.
- Fernández-Ruiz, A., Oliva, A., de Oliveira, E.F., Rocha-Almeida, F., Tingley, D., and Buzsáki, G. (2019). Long-duration hippocampal sharp wave ripples improve memory. *Science* (80-. ). 364, 1082–1086.
- Ioffe, S., and Szegedy, C. (2015). Batch normalization: Accelerating deep network training by reducing internal covariate shift. In 32nd International Conference on Machine Learning, ICML 2015, (International Machine Learning Society (IMLS)), pp. 448–456.
- Kingma, D.P., and Ba, J.L. (2015). Adam: A method for stochastic optimization. In 3rd International Conference on Learning Representations, ICLR 2015 - Conference Track Proceedings, (International Conference on Learning Representations, ICLR), p.
- Maas, A.L., Maas, A.L., Hannun, A.Y., and Ng, A.Y. (2013). Rectifier nonlinearities improve neural network acoustic models. *ICML Work. Deep Learn. AUDIO, SPEECH Lang. Process.*
- McInnes, L., Healy, J., and Melville, J. (2018). UMAP: Uniform Manifold Approximation and Projection for Dimension Reduction.
- Rosenblatt, F. (1958). The perceptron: A probabilistic model for information storage and organization in the brain. *Psychol. Rev.* 65, 386–408.

1189 Shamash, P., Carandini, M., Harris, K., and Steinmetz, N. (2018). A tool for analyzing  
1190 electrode tracks from slice histology. BioRxiv 447995.  
1191 Simonyan, K., Vedaldi, A., and Zisserman, A. (2013). Deep Inside Convolutional  
1192 Networks: Visualising Image Classification Models and Saliency Maps. 2nd Int. Conf.  
1193 Learn. Represent. ICLR 2014 - Work. Track Proc.  
1194 Springenberg, J.T., Dosovitskiy, A., Brox, T., and Riedmiller, M. (2014). Striving for  
1195 Simplicity: The All Convolutional Net. 3rd Int. Conf. Learn. Represent. ICLR 2015 -  
1196 Work. Track Proc.  
1197 Tikhonov, A.N., and Arsenin, V.Y. (1977). Solutions of Ill-Posed Problems (New York:  
1198 Winston).  
1199  
1200
